# Supplementary material for: Cultural Intelligence as a Partial Mediator of Adaptation-Innovation Link: A Bayesian Study of International Medical Students in China
Source: Research Square preprint supplement (doi:10.21203/rs.3.rs-7714046/v1), 2025-11-10
Supplement: Supplementary file 1 [file 0f6788c1f669908d1ea78013.docx]

**Descriptive analysis(n = 180)**

| **Scale** | **Dimension** | **M ± SD** |
| --- | --- | --- |
| Cultural Intelligence Scale | Metacognitive CQ | 21.33±4.02 |
|  | Cognitive CQ | 27.53±6.61 |
|  | Motivational CQ | 28.17±4.55 |
|  | Behavioral CQ | 25.66±4.99 |
|  | Total Score | 102.69±14.77 |
| Sociocultural Adaptation Scale | Cultural Empathy & Relatedness | 35.65±5.52 |
|  | Impersonal Endeavors & Perils | 46.44±6.59 |
|  | Total Score | 82.09±11.08 |
| Innovative Behavior Scale | Idea Generation | 16.07±3.05 |
|  | Idea Promotion | 14.69±3.07 |
|  | Idea Implementation | 15.37±3.18 |
|  | Total Score | 46.13±7.91 |

**Correlations analysis (n = 180)**

| **Pearson correlation analysis** | **1** | **2** | **3** | **4** | **5** | **6** | **7** | **8** | **9** | **10** | **11** | **12** |
| --- | --- | --- | --- | --- | --- | --- | --- | --- | --- | --- | --- | --- |
| 1.Metacognitive CQ | 1 | .299** | .491** | .279** | .651** | 0.069 | 0.115 | 0.103 | .281** | .298** | .295** | .342** |
| 2.Cognitive CQ | .299** | 1 | .351** | .344** | .753** | .197** | .171* | .200** | .220** | .355** | .340** | .359** |
| 3.Motivational CQ | .491** | .351** | 1 | .526** | .777** | .251** | .263** | .282** | .496** | .425** | .423** | .526** |
| 4.Behavioral CQ | .279** | .344** | .526** | 1 | .730** | .174* | .193** | .201** | .346** | .430** | .371** | .449** |
| 5.Cultural Intelligence Scale | .651** | .753** | .777** | .730** | 1 | .243** | .254** | .272** | .445** | .516** | .488** | .568** |
| 6.Cultural Empathy & Relatedness | 0.069 | .197** | .251** | .174* | .243** | 1 | .671** | .898** | .292** | .262** | .242** | .312** |
| 7.Impersonal Endeavors & Perils | 0.115 | .171* | .263** | .193** | .254** | .671** | 1 | .929** | .217** | 0.135 | .159* | .200** |
| 8.Sociocultural Adaptation Scale | 0.103 | .200** | .282** | .201** | .272** | .898** | .929** | 1 | .275** | .211** | .215** | .274** |
| 9.Idea Generation | .281** | .220** | .496** | .346** | .445** | .292** | .217** | .275** | 1 | .559** | .537** | .818** |
| 10.Idea Promotion | .298** | .355** | .425** | .430** | .516** | .262** | 0.135 | .211** | .559** | 1 | .661** | .869** |
| 11.Idea Implementation | .295** | .340** | .423** | .371** | .488** | .242** | .159* | .215** | .537** | .661** | 1 | .865** |
| 12.Innovative Behavior Scale | .342** | .359** | .526** | .449** | .568** | .312** | .200** | .274** | .818** | .869** | .865** | 1 |
| **P*<0.05; ***P*<0.01. | | | | | | | | | | | | |
