# Supplementary material for: Cultural Intelligence as a Partial Mediator of Adaptation-Innovation Link: A Bayesian Study of International Medical Students in China
Source: Research Square preprint supplement (doi:10.21203/rs.3.rs-7714046/v1), 2025-11-10
Supplement: Supplementary file 2 [file 17a03d35b747087a731e66a7.docx]

**Outcome:** Innovative Behavior Scale Scores

1.Prior overseas experience before studying abroad

Method: LSD

| (I) Prior overseas experience before studying abroad | (J) Prior overseas experience before studying abroad | Mean Difference (I-J) | Std. error | P value | 95% Confidence interval | |
| --- | --- | --- | --- | --- | --- | --- |
| Lower bound | Upper bound |
| None | Short-term travel/exchange (<3 months) | -3.05 | 1.49 | 0.04* | -5.99 | -0.11 |
|  | Long-term residence (≥3 months) | -5.68 | 1.78 | ＜0.01** | -9.19 | -2.17 |
| Short-term travel/exchange (<3 months) | None | 3.05 | 1.49 | 0.04* | 0.11 | 5.99 |
|  | Long-term residence (≥3 months) | -2.63 | 2.11 | 0.21 | -6.79 | 1.52 |
| Long-term residence (≥3 months) | None | 5.68 | 1.78 | ＜0.01** | 2.17 | 9.19 |
|  | Short-term travel/exchange (<3 months) | 2.63 | 2.11 | 0.21 | -1.52 | 6.79 |
| *P＜0.05, **P＜0.01. | | | | | | |

2.Main source of financial support

Method: LSD

| (I) Main source of financial support | (J) Main source of financial support | Mean Difference (I-J) | Std. error | P value | 95% Confidence interval | |
| --- | --- | --- | --- | --- | --- | --- |
| Lower bound | Upper bound |
| Family support | Scholarship | -4.63 | 1.84 | ＜0.01** | -8.27 | -0.99 |
|  | Other | -8.98 | 5.53 | 0.11 | -19.89 | 1.93 |
| Scholarship | Family support | 4.63 | 1.84 | ＜0.01** | 0.99 | 8.27 |
|  | Other | -4.35 | 5.76 | 0.45 | -15.72 | 7.02 |
| Other | Family support | 8.98 | 5.53 | 0.11 | -1.93 | 19.89 |
|  | Scholarship | 4.35 | 5.76 | 0.45 | -7.02 | 15.72 |
| *P＜0.05, **P＜0.01. | | | | | | |

3.Self-assessed psychological adaptation ability

Method: LSD

| (I) Self-assessed psychological adaptation ability | (J) Self-assessed psychological adaptation ability | Mean Difference (I-J) | Std. error | P value | 95% Confidence interval | |
| --- | --- | --- | --- | --- | --- | --- |
| Lower bound | Upper bound |
| Poor | Good | -3.51 | 2.64 | 0.19 | -8.73 | 1.70 |
|  | Very good | -7.81 | 2.76 | ＜0.01** | -13.26 | -2.36 |
| Good | Poor | 3.51 | 2.64 | 0.19 | -1.70 | 8.73 |
|  | Very good | -4.30 | 1.27 | ＜0.01** | -6.81 | -1.79 |
| Very good | Poor | 7.81 | 2.76 | ＜0.01** | 2.36 | 13.26 |
|  | Good | 4.30 | 1.27 | ＜0.01** | 1.79 | 6.81 |
| *P＜0.05, **P＜0.01. | | | | | | |

4.Duration of Stay in China

Method: LSD

| (I) Duration of Stay in China | (J) Duration of Stay in China | Mean Difference (I-J) | Std. error | P value | 95% Confidence interval | |
| --- | --- | --- | --- | --- | --- | --- |
| Lower bound | Upper bound |
| Less than 6 months | 6 months - 1 year | 3.63 | 1.93 | 0.06 | -0.18 | 7.44 |
|  | 1 - 2 years | 5.19 | 2.01 | 0.01* | 1.23 | 9.14 |
|  | More than 2 years | 1.96 | 1.87 | 0.29 | -1.72 | 5.65 |
| 6 months - 1 year | Less than 6 months | -3.63 | 1.93 | 0.06 | -7.44 | 0.18 |
|  | 6 months - 1 year | 1.56 | 1.64 | 0.34 | -1.67 | 4.79 |
|  | 1 - 2 years | -1.67 | 1.46 | 0.26 | -4.56 | 1.22 |
| 1 - 2 years | Less than 6 months | -5.188 | 2.005 | 0.01* | -9.14 | -1.23 |
|  | 6 months - 1 year | -1.558 | 1.636 | 0.34 | -4.79 | 1.67 |
|  | More than 2 years | -3.224 | 1.56 | 0.04* | -6.3 | -0.14 |
| More than 2 years | Less than 6 months | -1.964 | 1.867 | 0.29 | -5.65 | 1.72 |
|  | 6 months - 1 year | 1.666 | 1.464 | 0.26 | -1.22 | 4.56 |
|  | 1 - 2 years | 3.224 | 1.56 | 0.04* | 0.14 | 6.3 |
| *P＜0.05, **P＜0.01. | | | | | | |

5.Level of understanding of Chinese culture before studying abroad

Method: LSD

| (I) Level of understanding of Chinese culture before studying abroad | (J) Level of understanding of Chinese culture before studying abroad | Mean Difference (I-J) | Std. error | P value | 95% Confidence interval | |
| --- | --- | --- | --- | --- | --- | --- |
| Lower bound | Upper bound |
| No understanding at all | Limited knowledge | 0.56 | 1.42 | 0.70 | -2.25 | 3.37 |
|  | Fairly familiar | -1.62 | 1.70 | 0.34 | -4.97 | 1.73 |
|  | Very familiar | -11.82 | 3.11 | ＜0.01** | -17.95 | -5.69 |
| Limited knowledge | No understanding at all | -0.56 | 1.42 | 0.70 | -3.37 | 2.25 |
|  | Fairly familiar | -2.18 | 1.45 | 0.14 | -5.04 | 0.68 |
|  | Very familiar | -12.38 | 2.98 | ＜0.01** | -18.25 | -6.50 |
| Fairly familiar | No understanding at all | 1.621 | 1.699 | 0.34 | -1.73 | 4.97 |
|  | Limited knowledge | 2.177 | 1.449 | 0.135 | -0.68 | 5.04 |
|  | Very familiar | -10.198 | 3.117 | ＜0.01** | -16.35 | -4.05 |
| Very familiar | No understanding at all | 11.819 | 3.106 | ＜0.01** | 5.69 | 17.95 |
|  | Limited knowledge | 12.375 | 2.976 | ＜0.01** | 6.5 | 18.25 |
|  | Fairly familiar | 10.198 | 3.117 | ＜0.01** | 4.05 | 16.35 |
| *P＜0.05, **P＜0.01. | | | | | | |

6.Experience of cultural conflicts during study abroad

Method: LSD

| (I) Experience of cultural conflicts during study abroad | (J) Experience of cultural conflicts during study abroad | Mean Difference (I-J) | Std. error | P value | 95% Confidence interval | |
| --- | --- | --- | --- | --- | --- | --- |
| Lower bound | Upper bound |
| Never | Occasionally | 0.212 | 1.323 | 0.87 | -2.4 | 2.82 |
|  | Often | 1.586 | 1.666 | 0.34 | -1.7 | 4.87 |
|  | Frequently | -9.538 | 3.622 | ＜0.01** | -16.69 | -2.39 |
| Occasionally | Never | -0.212 | 1.323 | 0.87 | -2.82 | 2.4 |
|  | Often | 1.374 | 1.594 | 0.39 | -1.77 | 4.52 |
|  | Frequently | -9.75 | 3.589 | ＜0.01** | -16.83 | -2.67 |
| Often | Never | -1.586 | 1.666 | 0.34 | -4.87 | 1.7 |
|  | Occasionally | -1.374 | 1.594 | 0.39 | -4.52 | 1.77 |
|  | Frequently | -11.124 | 3.729 | ＜0.01** | -18.48 | -3.76 |
| Frequently | Never | 9.538 | 3.622 | ＜0.01** | 2.39 | 16.69 |
|  | Occasionally | 9.75 | 3.589 | ＜0.01** | 2.67 | 16.83 |
|  | Often | 11.124 | 3.729 | ＜0.01** | 3.76 | 18.48 |
| *P＜0.05, **P＜0.01. | | | | | | |

7.Year of Study

Method: Turkey HSD

| (I) Year of Study | (J) Year of Study | Mean Difference (I-J) | Std. error | P value | 95% Confidence interval | |
| --- | --- | --- | --- | --- | --- | --- |
| Lower bound | Upper bound |
| Foundation / Preparatory | First Year (Freshman) | 0.023 | 1.738 | 0.99 | -3.41 | 3.45 |
|  | Second Year (Sophomore) | 4.693 | 2.296 | 0.04* | 0.16 | 9.23 |
|  | Third Year (Junior) | -0.178 | 2.653 | 0.95 | -5.41 | 5.06 |
|  | Fourth Year (Senior) | -0.89 | 2.484 | 0.721 | -5.79 | 4.01 |
|  | Postgraduate | -6.211 | 3.317 | 0.06 | -12.76 | 0.34 |
| First Year (Freshman) | Foundation / Preparatory | -0.023 | 1.738 | 0.99 | -3.45 | 3.41 |
|  | Second Year (Sophomore) | 4.67 | 1.866 | ＜0.01** | 0.99 | 8.35 |
|  | Third Year (Junior) | -0.202 | 2.29 | 0.93 | -4.72 | 4.32 |
|  | Fourth Year (Senior) | -0.913 | 2.092 | 0.663 | -5.04 | 3.22 |
|  | Postgraduate | -6.235 | 3.035 | 0.04* | -12.23 | -0.24 |
| Second Year (Sophomore) | Foundation / Preparatory | -4.693 | 2.296 | 0.04* | -9.23 | -0.16 |
|  | First Year (Freshman) | -4.67 | 1.866 | ＜0.01** | -8.35 | -0.99 |
|  | Third Year (Junior) | -4.872 | 2.738 | 0.08 | -10.28 | 0.53 |
|  | Fourth Year (Senior) | -5.583 | 2.574 | 0.03* | -10.66 | -0.5 |
|  | Postgraduate | -10.905 | 3.386 | ＜0.01** | -17.59 | -4.22 |
| Third Year (Junior) | Foundation / Preparatory | 0.178 | 2.653 | 0.95 | -5.06 | 5.41 |
|  | First Year (Freshman) | 0.202 | 2.29 | 0.93 | -4.32 | 4.72 |
|  | Second Year (Sophomore) | 4.872 | 2.738 | 0.077 | -0.53 | 10.28 |
|  | Fourth Year (Senior) | -0.712 | 2.897 | 0.806 | -6.43 | 5.01 |
|  | Postgraduate | -6.033 | 3.637 | 0.099 | -13.21 | 1.15 |
| Fourth Year (Senior) | Foundation / Preparatory | 0.89 | 2.484 | 0.721 | -4.01 | 5.79 |
|  | First Year (Freshman) | 0.913 | 2.092 | 0.663 | -3.22 | 5.04 |
|  | Second Year (Sophomore) | 5.583 | 2.574 | 0.03* | 0.5 | 10.66 |
|  | Third Year (Junior) | 0.712 | 2.897 | 0.806 | -5.01 | 6.43 |
|  | Postgraduate | -5.321 | 3.516 | 0.132 | -12.26 | 1.62 |
| Postgraduate | Foundation / Preparatory | 6.211 | 3.317 | 0.06 | -0.34 | 12.76 |
|  | First Year (Freshman) | 6.235 | 3.035 | 0.04* | 0.24 | 12.23 |
|  | Second Year (Sophomore) | 10.905 | 3.386 | ＜0.01** | 4.22 | 17.59 |
|  | Third Year (Junior) | 6.033 | 3.637 | 0.099 | -1.15 | 13.21 |
|  | Fourth Year (Senior) | 5.321 | 3.516 | 0.132 | -1.62 | 12.26 |
| *P＜0.05, **P＜0.01. | | | | | | |
